# Supplementary material for: Epidemiological tracing of bovine tuberculosis in Switzerland, multilocus variable number of tandem repeat analysis of Mycobacterium bovis and Mycobacterium caprae
Source: PubMed Central journal article supplement (PMC5319696; doi:10.1371/journal.pone.0172474), 2017-02-21
Supplement: pone.0172474.s004.pdf [file pone.0172474.s004.pdf]

# A

Strain: H37Rv **Forward Primer**  
GGGTTGCTGG ATGACAACGT GTACACGTTT TTGGTGC GCC CGGATTCCAA CAAGACGCAG ATCAAGATCG CCGTCGAGAA GATTTTTGCC GTCAAGGTCG 100

Strain: 13-450 long GGGTTGCTGG ATGACAACGT GTACACGTTT TTGGTGC GCC CGGATTCCAA CAAGACGCAG ATCAAGATCG CCGTCGAGAA GATTTTTGCC GTCAAGGTCG 100

Strain: H37Rv CATCGGTGAA CACCGCGAAC CGGCAGGGCA AGCGTAAACG CACCCGGACC GGATACGGCA AGCGCAAGAG CACCAAGCGC GCCATCGTCA CCCTGGCGCC 200

Strain: 13-450 long CATCGGTGAA CACCGCGAAC CGGCAGGGCA AGCGTAAACG CACCCGGACC GGATACGGCA AGCGCAAGAG CACCAAGCGC GCCATCGTCA CCCTGGCGCC 200

Strain: H37Rv GGGCAGCAGG CCGATCGACC TGTTCCGGGC ACCGGCCTAG CCCGGCGACG ATGCAGAGCG AAGCGATGAG GAGGAGCAGG GCAATGCGGC CTAGCCCGGC 300

Strain: 13-450 long GGGCAGCAGG CCGATCGACC TGTTCCGGGC ACCGGCCTAG CCCGGC**Repeat Unit 1**GACG ATGCAGAGCG AAGCGATGAG GAGGAGCAGG GCAATGCGGC CTAGCCCGGC 300

Strain: H37Rv -----GACGAG AGCGTGAGAG AAAGACCTGA TTAGACATGG CAATTGCGAA 346

Strain: 13-450 long **Repeat Unit 2**  
GACGATGCAG AGCGAAGCGA TGAGGAGGAG CAGGGCAATG CGGCCTAGCC CGGCGACGAG AGCGTGAGAG AAAGACCTGA TTAGACATGG CAATTGCGAA 400

Strain: H37Rv **Reverse Primer**  
GTACAAGCCC ACGACGCCTG GTCGTCGCGG CGCCAGCGTA TCTGATTTCG CCGAGATCAC CC 408

Strain: 13-450 long GTACAAGCCC ACGACGCCTG GTCGTCGCGG CGCCAGCGTA TCTGATTTCG CCGAGATCAC CC 462

# B

Strain: H37Rv **Forward Primer**  
GGGTTGCTGG ATGACAACGT GTACACGTTT TTGGTGC GCC CGGATTCCAA CAAGACGCAG ATCAAGATCG CCGTCGAGAA GATTTTTGCC GTCAAGGTCG 100

Strain: 13-450 short GGGTTGCTGG ATGACAACGT GTACACGTTT **GTCTGTCAACC** CGGACTCGAA CAAGACGCAG ATCAAGATCG CCGTGGAGAA GATCTTCTCG GTCAAGGTCG 100

Strain: H37Rv CATCGGTGAA CACCGCGAAC CGGCAGGGCA AGCGTAAACG CACCCGGACC GGATACGGCA AGCGCAAGAG CACCAAGCGC GCCATCGTCA CCCTGGCGCC 200

Strain: 13-450 short CGTTCGGTGA CACCGCCAAT CGGCAGGGCA AGCGCAAGCG CACCAGGACC GGATTCGGCA GCGCAAGAG CACCAAACGC GCCATCGTCA CCCTGGCC 200

Strain: H37Rv GGGCAGCAGG CCGATCGACC TGTTCCGGGC ACCGGCCTAG CCCGGC**Repeat Unit 1**GACG ATGCAGAGCG AAGCGATGAG GAGGAGCAGG GCAATGCGGC CTAGCCCGGC 300

Strain: 13-450 short GGGCAGCAA G CCGATCGACC TGTTCCGAGC GCGGCCTAG CC----- 242

Strain: H37Rv **Reverse Primer**  
GACGAGAGCG TGAGAGAAAG ACCTGATTAG ACATGGCAAT TCGCAAGTAC AAGCCACGA CGCTGGTTCG TCGCGCGGCC AGCGTATCTG ATTTGCGCGA 400

Strain: 13-450 short -----GCGCG CGAGAGAGAG ACCTGATAAG ACATGGCAAT TCGCAAGTAC AAGCCACGA CACCGGGTCG TCGCGCGGCC AGCGTATCTG ATTTGCGCGA 337

Strain: H37Rv **GATCACCC** 408

Strain: 13-450 short GATCACCC 345
